# Supplementary material for: miR-29a-3p directly targets Smad nuclear interacting protein 1 and inhibits the migration and proliferation of cervical cancer HeLa cells
Source: PeerJ. 2020 Oct 20;8:e10148. doi: 10.7717/peerj.10148 (PMC7583608; doi:10.7717/peerj.10148)
Supplement: Table S1 [file peerj-08-10148-s004.xlsx]

## Sheet: Sheet1
TableS1. Co-expression analysis for the miR-29a-3p-SNIP1 in different cancer samples (starbase)
Cancer	CancerFullName	SampleNum	Coefficient-R	p-value
KIRC	Kidney Renal Clear Cell Carcinoma	517	-0.298	4.62e-12
KIRP	Kidney Renal Papillary Cell Carcinoma	289	-0.21	0.000331
STAD	Stomach Adenocarcinoma	372	-0.209	4.98e-05
READ	Rectum Adenocarcinoma	161	-0.167	0.0347
CESC	Cervical Squamous Cell Carcinoma and Endocervical Adenocarcinoma	306	-0.165	0.0039
SARC	Sarcoma	261	-0.139	0.0249
UCEC	Uterine Corpus Endometrial Carcinoma	538	-0.116	0.00713
BRCA	Breast Invasive Carcinoma	1085	-0.062	0.0408
HNSC	Head and Neck Squamous Cell Carcinoma	497	0.124	0.00571
LIHC	Liver Hepatocellular Carcinoma	370	0.13	0.0125
